# Supplementary material for: Case-mix adjusted hospital mortality is a poor proxy for preventable mortality: a modelling study
Source: PubMed Central journal article supplement — BMJ Qual Saf. 2012 Oct 16;21(12):1052–6. doi: 10.1136/bmjqs-2012-001202 (PMC3551201; doi:10.1136/bmjqs-2012-001202), 2012-10-16
Supplement: bmjqs-2012-001202-s1.pdf [file bmjqs-2012-001202-s1.pdf]

## Appendix: Derivation of the bound for Q

In the model, the hospital mortality rate is partitioned into two components:

$$M = U + V .$$

Suppose that  $X$  denotes the case-mix for a hospital, and let  $M(X)$  be the expected mortality rate for a hospital with case-mix  $X$ : i.e.  $M(X) = E(M | X)$ . The SMR is  $\frac{M}{M(X)}$ , with variance  $\sigma_{SMR}^2$ , and the

proportion of the variation in total mortality explained by case-mix is given by  $R^2 = \frac{\text{var } M(X)}{\sigma_M^2}$ ,

with  $\sigma_M^2 = \text{var } M$ . Similarly,  $r^2 = \frac{\text{var } E(V | X)}{\sigma_V^2}$  is the proportion of the variation in preventable

mortality explained by case-mix.

With these notations, the conditional variance formula [1] may be applied to give:

$$(a) (1 - R^2)\sigma_M^2 = E \text{var}(M | X) \text{ and } (b) \sigma_{SMR}^2 = E[M(X)^{-2} \text{var}(M | X)]$$

The first assumption mentioned in the text may be formulated as:

A1: For given case-mix,  $X$ , the components  $U$  and  $V$  are conditionally independent.

Under A1 the conditional covariance formula [1] implies

$$(c) \text{cov}(SMR, V) = \rho \sigma_{SMR} \sigma_V = E[M(X)^{-1} \text{var}(V | X)]$$

The second assumption is:

A2: The conditional variances  $\text{var}(V | X)$  and  $\text{var}(M | X)$  are constant for all values of the case-mix  $X$ .

Under (A2), the conditional variances can be taken outside the expectation operators in (a), (b) and (c) leading to:

$$(e) Q \sigma_{\text{SMR}} \sigma_V = \text{var}(V | X) E[M(X)^{-1}] = (1 - r^2) \sigma_V^2 E[M(X)^{-1}], \text{ and (f) } \frac{\sigma_{\text{SMR}}^2}{(1 - R^2) \sigma_M^2} = E[M(X)^{-2}].$$

Furthermore, (g)  $(1 + t^2) [E M(X)^{-1}]^2 = E[M(X)^{-2}]$  where  $t$  is the coefficient of variation of the

quantity  $M(X)^{-1}$ . It follows from (e), (f) and (g) that  $Q = \frac{\sigma_V}{\sigma_M \sqrt{1 - R^2}} \frac{1 - r^2}{\sqrt{1 + t^2}}$ . Therefore

$$Q < \frac{\sigma_V}{\sigma_M \sqrt{1 - R^2}} = \frac{\xi c_V}{c_M \sqrt{1 - R^2}}, \quad (2)$$

which is the result used in the paper.

Now replace condition A2 by

A2': For some constant  $K$ ,  $\text{var}(M | X) = KM(X)^2$ . Also assume that  $\text{var}(V | X)$  is non-decreasing as  $M(X)$  increases.

The effect of using A2' in place of A2 is to replace (e) and (f) above by

$$(e') Q \sigma_{\text{SMR}} \sigma_V < (1 - r^2) \sigma_V^2 E[M(X)^{-1}] \text{ and (f')} \frac{\sigma_{\text{SMR}}^2}{(1 - R^2) \sigma_M^2} = \{E[M(X)^2]\}^{-1}.$$

From which we have  $Q < \frac{\sigma_V}{\sigma_M \sqrt{1 - R^2}} (1 - r^2) E[M(X)^{-1}] \sqrt{E[M(X)^2]}$ .

Using a delta technique,  $E[M(X)^{-1}]$  may be approximated as  $\mu^{-1}(1 + \mu^{-2} \text{var } M(X)) = \mu^{-1}(1 + R^2 c_M^2)$

where  $\mu = EM(X) = EM$  is the mean hospital mortality rate. Similarly,  $\sqrt{E[M(X)^2]} \approx \mu(1 + \frac{1}{2} R^2 c_M^2)$ .

Thus, to leading order in  $c_M$ , we have the following bound

$$Q < \frac{\sigma_V}{\sigma_M \sqrt{1 - R^2}} \times \left(1 + \frac{3}{2} R^2 c_M^2\right) (1 - r^2) \quad (2)$$

In the base-case ( $R^2 = 0.8$ ,  $c_M = 0.2$ ) this implies an increase of up to 5% in the previous bound for Q – i.e. in comparison with (2) – and up to 10% in the bound for  $Q^2$ . However, the increase will be attenuated by the factor  $(1 - r^2)$  and disappears altogether if 5% of the variation in preventable mortality rates can be explained by case-mix (i.e.  $r^2 = 0.05$ ). In any case it is scarcely large enough to disturb the conclusions of the paper.

**Reference:**

1. Ross S. *A First Course in Probability*. 6<sup>th</sup> Edition. Harlow, UK: Pearson Prentice Hall. 2002.
